# Supplementary material for: Two-dimensional Fe3O4/MoS2 nanocomposites for a magnetorheological fluid with enhanced sedimentation stability
Source: Royal Society of Chemistry journal article supplement (doi:10.1039/c7sm02425h), 2018-01-01
Supplement: c7sm02425h1.pdf [file c7sm02425h1.pdf]

## Supporting Information

### Two-dimensional Fe<sub>3</sub>O<sub>4</sub>/MoS<sub>2</sub> nanocomposites for magnetorheological fluid with enhanced sedimentation stability

Guangshuo Wang<sup>a</sup>, Yingying Ma<sup>a,\*</sup>, Guohua Cui<sup>a</sup>, Nannan Li<sup>b</sup>, Xufeng Dong<sup>b</sup>

<sup>a</sup> School of Materials Science and Engineering, Hebei University of Engineering, Handan, 056038, China

<sup>b</sup> School of Materials Science and Engineering, Dalian University of Technology, Dalian, 116024, China

\* Correspondence to: myy8136@163.com (Ma YY)

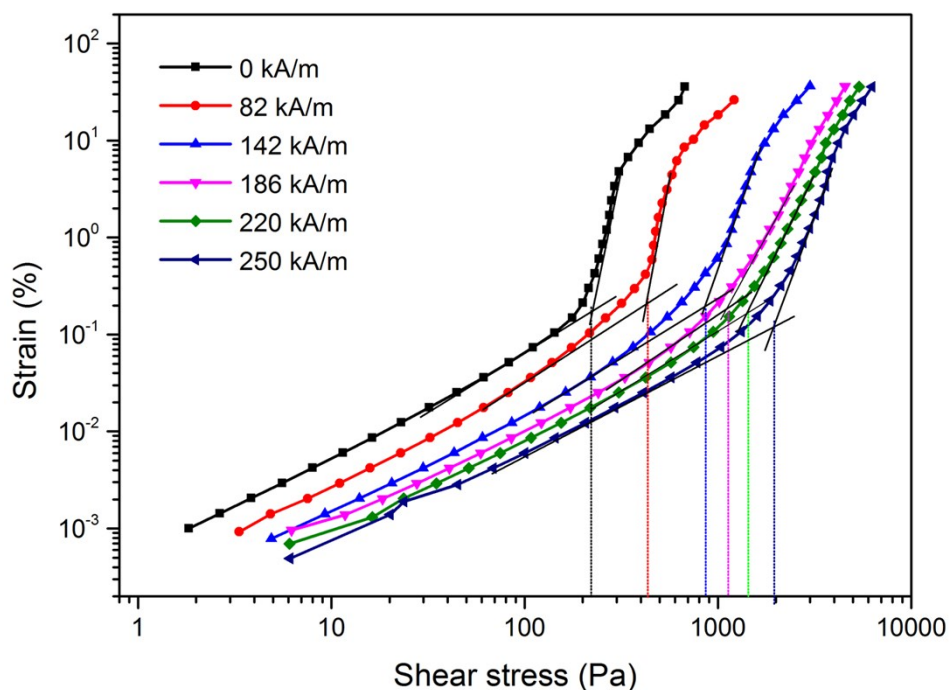

**Fig. S1** The static yield stress measured under the stress sweep mode
